# Supplementary material for: TiO2 microspheres supported polyoxometalate-based ionic liquids induced catalytic oxidative deep-desulfurization
Source: Royal Society of Chemistry journal article supplement (doi:10.1039/c6ra03895f), 2016-01-01
Supplement: c6ra03895f1.pdf [file c6ra03895f1.pdf]

## Supporting Information

### **TiO<sub>2</sub> Microspheres Supported Polyoxometalate-based Ionic Liquids Induced Catalytic Oxidative Deep-desulfurization**

Suhang Xun<sup>a</sup>, Dan Zheng<sup>a</sup>, Sheng Yin<sup>a</sup>, Yuejiao Qin<sup>a</sup>, Ming Zhang<sup>b</sup>, Wei Jiang<sup>b</sup>, Wenshuai Zhu<sup>a\*</sup>,  
Huaming Li<sup>b\*</sup>

<sup>a</sup>*School of Chemistry and Chemical Engineering, Jiangsu University, Zhenjiang, 212013, P. R. China*

<sup>b</sup>*Institute for Energy Research, Jiangsu University, Zhenjiang, 212013, P. R. China*

*\*Corresponding author: Tel.: +86-511-88791800; Fax: +86-511-88791708;*

*E-mail address: zhuws@ujs.edu.cn (W. S. Zhu) , lhm@ujs.edu.cn (H. M. Li)*

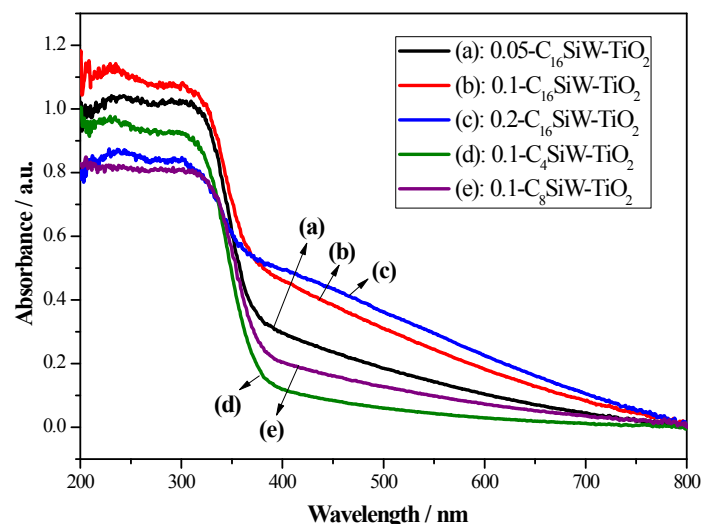

**Fig. S1** DRS spectra of (a): 0.05-C<sub>16</sub>SiW-TiO<sub>2</sub>, (b): 0.1-C<sub>16</sub>SiW-TiO<sub>2</sub>, (c): 0.2-C<sub>16</sub>SiW-TiO<sub>2</sub>, (d): 0.1-C<sub>4</sub>SiW-TiO<sub>2</sub>, (e): 0.1-C<sub>8</sub>SiW-TiO<sub>2</sub>.

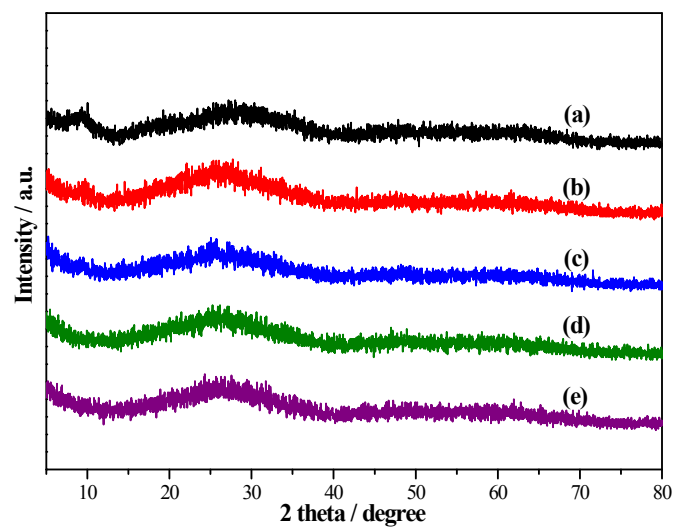

**Fig. S2** Wide-angle XRD patterns of (a): 0.05-C<sub>16</sub>SiW-TiO<sub>2</sub>, (b): 0.1-C<sub>16</sub>SiW-TiO<sub>2</sub>, (c): 0.2-C<sub>16</sub>SiW-TiO<sub>2</sub>, (d): 0.1-C<sub>4</sub>SiW-TiO<sub>2</sub>, (e): 0.1-C<sub>8</sub>SiW-TiO<sub>2</sub>.

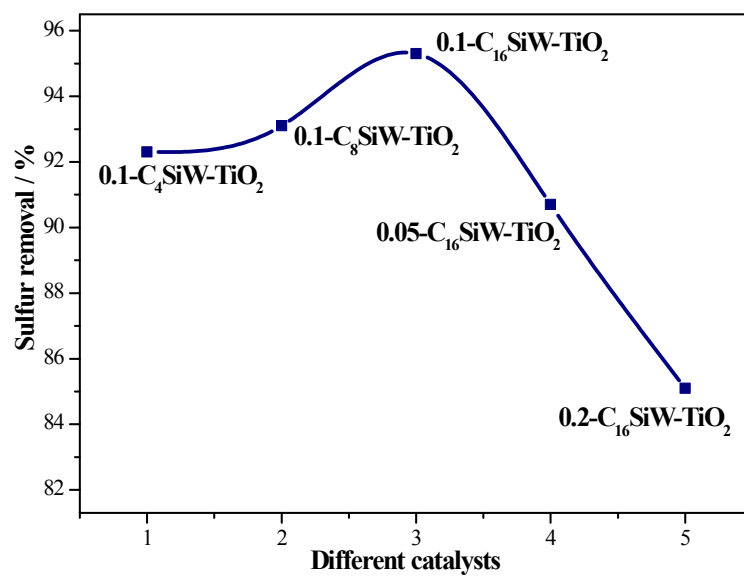

**Fig. S3.** Effect of different catalysts on the removal of DBT.

Experimental conditions:  $m(\text{catalyst}) = 0.01 \text{ g}$ ,  $V([\text{Bmim}]\text{BF}_4) = 1 \text{ mL}$ ,  $T = 50^\circ\text{C}$ ,  $t = 1$

$h$ ,  $n(\text{O/S}) = 2$ ,  $V(\text{model oil}) = 5 \text{ mL}$ .

**Table S1.** The effect of different extractants on the removal of DBT

| Entry | Different ILs         | Sulfur removal / % |                    |
|-------|-----------------------|--------------------|--------------------|
|       |                       | EDS <sup>a</sup>   | ECODS <sup>b</sup> |
| 1     | [Bmim]PF <sub>6</sub> | 16.8               | 18.7               |
| 2     | [Omim]PF <sub>6</sub> | 31.3               | 50.5               |
| 3     | [Bmim]BF <sub>4</sub> | 18.9               | 95.3               |
| 4     | [Omim]BF <sub>4</sub> | 32.5               | 93.2               |

Experiment conditions:  $m(\text{catalyst}) = 0.01 \text{ g}$ ,  $V_{\text{IL}} = 1 \text{ mL}$ ,  $n(\text{O/S}) = 2$ ,  $T = 50^\circ\text{C}$ ,

$V(\text{model oil}) = 5 \text{ mL}$ . a:  $t = 15 \text{ min}$ ; b:  $t = 1 \text{ h}$ .

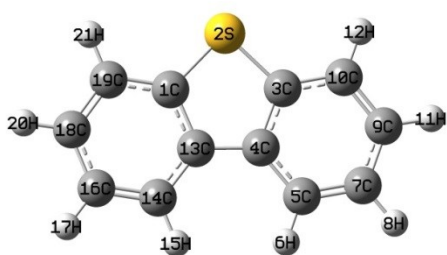

(a). DBT

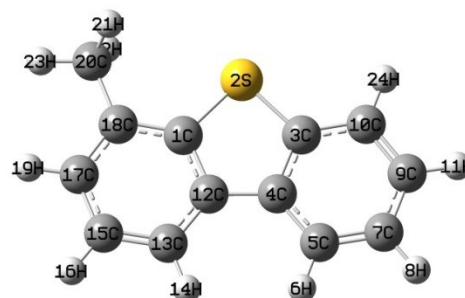

(b). 4-MDBT

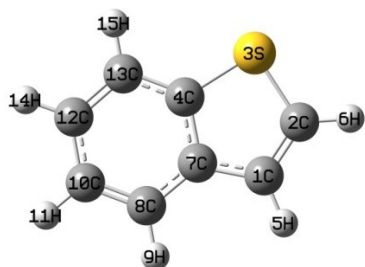

(c). BT

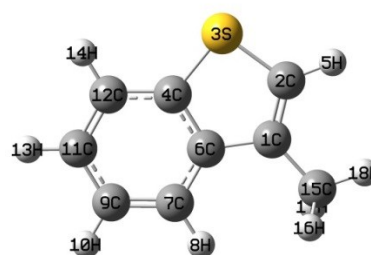

(d). 3-MBT

**Fig. S4.** Spatial structure of the different substrate. (a). DBT, (b). 4-MDBT, (c). BT and (d). 3-MBT.
